# Supplementary material for: Yield-limiting nutrient response of lowbush blueberry grown in recent and ancient alluvial soils of the Mekong Delta
Source: PeerJ. 2024 Sep 27;12:e17992. doi: 10.7717/peerj.17992 (PMC11441383; doi:10.7717/peerj.17992)
Supplement: Supplemental Information 1 [file peerj-12-17992-s001.xlsx]

## Sheet: Biomass-Content-Uptake
						Biomass (g/plant)			Stem mineral content (g/kg)			Leaf mineral content (g/kg)			Fruit mineral content (g/kg)				Uptake_Stem (g)		Uptake_Leaf (g)			Uptake_Fruit(g)			Plant UPTAKE (g/plant)			Plant UPTAKE (kg/Ha)
STT	SITES	TRT	SITES	TRT	laplai	Stem	Leaf	Fruit	N	P	K	N	P	K	N	P	K	N	P	K	N	P	K	N	P	K	N	P	K	N	P	K
1	VL	+NPK	1	1	1	9.72	5.7	10.2	6.4	3.2	8.4	19.1	1.45	6.74	11.1	1.26	7.3	0.062208	0.031104	0.081648	0.10887	0.008265	0.038418	0.11322	0.012852	0.07446	0.284298	0.052221	0.194526	42.6447	8.35536	31.1242
2	VL	+NPK	1	1	2	10.384	6.8	10.8	7.5	3.4	7.9	20.81	1.6	6.54	11.9	1.39	6.9	0.07788	0.0353056	0.0820336	0.141508	0.01088	0.044472	0.12852	0.015012	0.07452	0.347908	0.0611976	0.201026	52.1862	9.79162	32.1641
3	VL	+NPK	1	1	3	9.4	5.4	10.4	6.94	3.7	7.7	19.25	1.65	5.74	11.232	1.58	7.1	0.065236	0.03478	0.07238	0.10395	0.00891	0.030996	0.116813	0.016432	0.07384	0.285999	0.060122	0.177216	42.8998	9.61952	28.3546
4	VL	+NPK	1	1	4	9.9	5.796	10.6	6.7	3.6	7.8	18.85	1.33	5.34	11.4	1.1	6.3	0.06633	0.03564	0.07722	0.109255	0.00770868	0.0309506	0.12084	0.01166	0.06678	0.296425	0.0550087	0.174951	44.4637	8.80139	27.9921
5	VL	-N	1	2	1	7.4	4.04	4.6	5.76	2.9	7.1	14.4	0.93	4.2	10.82	0.7	4.3	0.042624	0.02146	0.05254	0.058176	0.0037572	0.016968	0.049772	0.00322	0.01978	0.150572	0.0284372	0.089288	22.5858	4.54995	14.2861
6	VL	-N	1	2	2	6.1168	3.13864	5.4	6	2.5	7.5	13.6	0.74	3.8	10.19	0.6	3.9	0.0367008	0.015292	0.045876	0.0426855	0.00232259	0.0119268	0.055026	0.00324	0.02106	0.134412	0.0208546	0.0788628	20.1618	3.33673	12.6181
7	VL	-N	1	2	3	7.016	3.14	4.8	5.52	2.8	7.4	12.2	0.89	3.6	9.65	0.7	3.8	0.0387283	0.0196448	0.0519184	0.038308	0.0027946	0.011304	0.04632	0.00336	0.01824	0.123356	0.0257994	0.0814624	18.5034	4.1279	13.034
8	VL	-N	1	2	4	7.13	3.63	5.06	5.76	2.8	7	13.1	0.91	4.1	9.74	0.6	3.6	0.0410688	0.019964	0.04991	0.047553	0.0033033	0.014883	0.0492844	0.003036	0.018216	0.137906	0.0263033	0.083009	20.6859	4.20853	13.2814
9	VL	-P	1	3	1	9.44	4.4352	7.6	6.08	2.4	7.4	17	1.15	5.3	8.442	0.67	5.1	0.0573952	0.022656	0.069856	0.0753984	0.00510048	0.0235066	0.0641592	0.005092	0.03876	0.196953	0.0328485	0.132123	29.5429	5.25576	21.1396
10	VL	-P	1	3	2	7.52	4.2	7.2	6.24	2.3	6.9	16	1.22	6.1	10.08	0.7	5.3	0.0469248	0.017296	0.051888	0.0672	0.005124	0.02562	0.072576	0.00504	0.03816	0.186701	0.02746	0.115668	28.0051	4.3936	18.5069
11	VL	-P	1	3	3	9.024	5.04	6.8	6.32	2.6	7.1	15.3	0.99	5.6	9.63	0.9	4.3	0.0570317	0.0234624	0.0640704	0.077112	0.0049896	0.028224	0.065484	0.00612	0.02924	0.199628	0.034572	0.121534	29.9442	5.53152	19.4455
12	VL	-P	1	3	4	8.496	4.0656	6.4	6.24	2.4	7.8	16	1.04	6.5	9.9	0.97	5.3	0.053015	0.0203904	0.0662688	0.0650496	0.00422822	0.0264264	0.06336	0.006208	0.03392	0.181425	0.0308266	0.126615	27.2137	4.93226	20.2584
13	VL	-K	1	4	1	7.744	5.088	8.4	6.48	3.5	6.5	17.5	1.33	5.6	11.25	0.85	4.3	0.0501811	0.027104	0.050336	0.08904	0.00676704	0.0284928	0.0945	0.00714	0.03612	0.233721	0.041011	0.114949	35.0582	6.56177	18.3918
14	VL	-K	1	4	2	8.4224	4.704	7.4	6	3.4	6.9	18	1.34	5.1	12.06	0.9	4.9	0.0505344	0.0286362	0.0581146	0.084672	0.00630336	0.0239904	0.089244	0.00666	0.03626	0.22445	0.0415995	0.118365	33.6676	6.65592	18.9384
15	VL	-K	1	4	3	8.416	4.2336	7.6	6.24	3.2	6.1	19	1.39	5.3	11.34	0.8	3.7	0.0525158	0.0269312	0.0513376	0.0804384	0.0058847	0.0224381	0.086184	0.00608	0.02812	0.219138	0.0388959	0.101896	32.8707	6.22334	16.3033
16	VL	-K	1	4	4	7.552	5.9112	9.2	6.48	3.3	7.4	18	1.26	5.8	10.89	0.9	5.5	0.048937	0.0249216	0.0558848	0.106402	0.00744811	0.034285	0.100188	0.00828	0.0506	0.255527	0.0406497	0.14077	38.329	6.50395	22.5232
17	LA	+NPK	2	1	1	9.4	5.62	8.8	5.9	3.4	7.4	18.6	1.305	5.818	10.16	0.88	4.611	0.05546	0.03196	0.06956	0.104532	0.0073341	0.0237895	0.089408	0.007744	0.0405768	0.2494	0.0470381	0.133926	37.41	7.5261	21.4282
18	LA	+NPK	2	1	2	9.2	5.0264	7.4	6.1	3.4	6.9	18.5	1.35	4.565	10.86	0.98	5.481	0.05612	0.03128	0.06348	0.0929884	0.00678564	0.0225283	0.080364	0.007252	0.0276834	0.229472	0.0453176	0.113692	34.4209	7.25082	18.1907
19	LA	+NPK	2	1	3	9.1	5.35	8.4	6.3	3.1	7.7	18.8	1.197	5.482	11.2	0.712	4.785	0.05733	0.02275	0.07007	0.10058	0.00746325	0.0293287	0.0749952	0.0059808	0.0303324	0.232905	0.036194	0.129731	34.9358	5.79105	20.757
20	LA	+NPK	2	1	4	9.832	5.8	9.4	5.8	3.8	6.9	19.1	1.251	5.482	10.336	0.801	4.611	0.0570256	0.0373616	0.0678408	0.11078	0.0070586	0.0317956	0.0923832	0.007144	0.0433434	0.260189	0.0515642	0.14298	39.0283	8.25027	22.8768
21	LA	-N	2	2	1	4.5	3.06	3.1	4.2	2.4	6.5	7.3592	0.77	3.237	6.2694	0.623	2.741	0.0189	0.0243	0.02925	0.0225192	0.0023562	0.00990522	0.0284301	0.0019313	0.0115971	0.0698493	0.0285875	0.0507523	10.4774	4.574	8.12037
22	LA	-N	2	2	2	4.1	2.42	2.88	4.4	2.5	6.9	7.828	0.86	3.684	7.371	0.534	3.306	0.01804	0.01025	0.02829	0.0189438	0.00248292	0.00891528	0.0299635	0.00153792	0.0092736	0.0669473	0.0142708	0.0464789	10.0421	2.28333	7.43662
23	LA	-N	2	2	3	3.843	2.32	3.68	3.6	2.5	6.4	8.0796	0.81	3.737	6.1597	0.423	2.263	0.0138348	0.0099918	0.0238266	0.0187447	0.0018792	0.00866984	0.0226677	0.00327888	0.0121661	0.0552472	0.0151499	0.0446625	8.28708	2.42398	7.146
24	LA	-N	2	2	4	3.46	2.14	3.52	3.4	2.7	7.8	6.8624	0.82	3.984	7.68	0.712	2.872	0.011764	0.009342	0.026988	0.0146855	0.0017548	0.00852576	0.0270336	0.00250624	0.0101094	0.0534831	0.013603	0.0456232	8.02247	2.17649	7.29971
25	LA	-P	2	3	1	5.5272	3.6216	5.4	5.26	2.8	7.1	13.6	1.035	4.142	8.928	0.712	4.177	0.0290731	0.0154762	0.0392431	0.0492538	0.00374836	0.0150007	0.0398034	0.0038448	0.0225558	0.11813	0.0230693	0.0767996	17.7195	3.69109	12.2879
26	LA	-P	2	3	2	5.2038	3.528	6.2	5.04	2.7	6.7	12.9	1.026	4.399	7.947	0.76	4.611	0.0262272	0.0140503	0.0348655	0.0455112	0.00289296	0.0155197	0.0492714	0.0026226	0.0285882	0.12101	0.0195658	0.0789733	18.1515	3.13053	12.6357
27	LA	-P	2	3	3	4.8	3.78	5.4	5.31	2.6	7.1	13.6	0.891	3.818	7.371	0.645	3.741	0.025488	0.01248	0.03072	0.051408	0.00336798	0.014432	0.0398034	0.003483	0.0295974	0.116699	0.019331	0.0747494	17.5049	3.09296	11.9599
28	LA	-P	2	3	4	4.5	3.0492	5.6	5.12	3.6	7.3	12	0.936	3.818	8.766	0.534	3.741	0.02304	0.0162	0.03285	0.0365904	0.00285405	0.0116418	0.06272	0.0029904	0.0202216	0.12235	0.0220445	0.0647134	18.3526	3.52711	10.3542
29	LA	-K	2	4	1	5.5272	3.55608	5.1	5.58	2.8	5.5	15	1.395	4.633	9.828	0.891	3.611	0.0308418	0.0154762	0.0303996	0.0533412	0.00425663	0.0164753	0.0527136	0.0036312	0.0139791	0.136897	0.023364	0.060854	20.5345	3.73824	9.73664
30	LA	-K	2	4	2	6.6038	3.4398	5.6	5.22	2.9	5.4	14.45	1.206	4.233	9.171	0.712	3.611	0.0344718	0.019151	0.0455662	0.0497051	0.0041484	0.0145607	0.0351086	0.0044856	0.0126728	0.119286	0.027785	0.0727997	17.8928	4.4456	11.648
31	LA	-K	2	4	3	5.7	4.05	5.4	6.11	3.7	6.1	16.15	1.217	4.482	10.404	0.712	3.82	0.034827	0.02109	0.03477	0.0654075	0.00506655	0.0181521	0.0561816	0.0038448	0.020628	0.156416	0.0300014	0.0735501	23.4624	4.80022	11.768
32	LA	-K	2	4	4	6.55872	4.4334	6.4	5.88	3.6	6.2	14.45	1.134	4.16	8.946	0.801	3.22	0.0385653	0.0236114	0.0406641	0.0640626	0.00502748	0.0184429	0.0572544	0.0051264	0.030624	0.159882	0.0337653	0.089731	23.9823	5.40244	14.357
								SD	0.894646	0.467049	0.689553	3.77728	0.243084	0.976014	1.57314	0.245371	1.23089
								Mean	5.74625	3.01562	7.025	15.1684	1.13822	4.84481	9.71941	0.814125	4.46256
								CV(%)	15.5692	15.4876	9.81571	24.9023	21.3565	20.1455	16.1856	30.1392	27.5826
						RECENT ALLUVIAL															OLD ALLUVIAL
						Dry weight (g/plant)				SD											Dry weight (g/plant)				SD
	g/plant					Stem	Leaf	Fruit		Stem	Leaf	Fruit				g/plant					Stem	Leaf	Fruit		Stem	Leaf	Fruit
	Stem	Leaf	Fruit		NPK	9.851	5.924	10.5		0.411117	0.607868	0.258199				TL khô_Than	TL khô_La	TL khô_Trai		NPK	9.383	5.4491	8.5		0.324278	0.337063	0.840635
NPK	9.72	5.7	10.2		PK	6.9157	3.48716	4.965		0.556409	0.435133	0.345784			NPK	9.4	5.62	8.8		PK	3.97575	2.485	3.295		0.437377	0.400458	0.369279
	10.384	6.8	10.8		NK	8.62	4.4352	7		0.828853	0.431164	0.516398				9.2	5.0264	7.4		NK	5.00775	3.4947	5.65		0.450642	0.314684	0.378594
	9.4	5.4	10.4		NP	8.0336	4.9842	8.15		0.452107	0.709933	0.822598				9.1	5.35	8.4		NP	6.09743	3.86982	5.625		0.563416	0.459506	0.556028
	9.9	5.796	10.6													9.832	5.8	9.4
PK	7.4	4.04	4.6												PK	4.5	3.06	3.1
	6.1168	3.13864	5.4													4.1	2.42	2.88
	7.016	3.14	4.8													3.843	2.32	3.68
	7.13	3.63	5.06													3.46	2.14	3.52
NK	9.44	4.4352	7.6												NK	5.5272	3.6216	5.4
	7.52	4.2	7.2													5.2038	3.528	6.2
	9.024	5.04	6.8													4.8	3.78	5.4
	8.496	4.0656	6.4													4.5	3.0492	5.6
NPK	7.744	5.088	8.4												NPK	5.5272	3.55608	5.1
	8.4224	4.704	7.4													6.6038	3.4398	5.6
	8.416	4.2336	7.6													5.7	4.05	5.4
	7.552	5.9112	9.2													6.55872	4.4334	6.4
												Treatments	Stem mineral content (g kg-1)				Leaf mineral content (g kg-1)				Fruit mineral content (g kg-1)
													N	P	K		N	P	K		N	P	K
												Omission
												NPK	6.45a	3.45a	7.58a		19.12a	1.39a	5.71a		11.02a	1.09a	5.88a
												PK	4.83c	2.63b	7.07b		10.42d	0.84d	3.79c		8.48b	0.61c	3.34d
												NK	5.7b	2.67b	7.17ab		14.55c	1.03c	4.95b		8.88b	0.73bc	4.53b
												NP	5.99b	3.30a	6.26c		16.56b	1.28b	4.91b		10.48a	0.82b	4.08c
												Soil types
												Recent Alluvial	6.29	3	7.3		16.75	1.2	5.33		10.6	0.91	5.1
												Old Alluvial	5.02	3.03	6.74		13.59	1.08	4.35		8.83	0.71	3.82
												F (A)	**	**	**		**	**	**		**	**	**
												F (B)	**	ns	**		**	**	**		**	**	**
												F (AxB)	**	*	ns		**	ns	*		*	*	ns
												CV(%)	15.5692	15.4876	9.81571		24.9023	21.3565	20.1455		16.1856	30.1392	27.5826
												DUNCAN		Stem mineral content (g kg-1)			Leaf mineral content (g kg-1)			Fruit mineral content (g kg-1)
													Omission	N	P	K	N	P	K	N	P	K
													NPK	a	a	a	a	a	a	a	a	a
													PK	c	b	b	d	d	c	c	c	b
													NK	b	b	ab	c	c	b	b	bc	b
													NP	ab	a	c	b	b	b	a	b	c

## Sheet: Fig 5. Uptake
			Plant UPTAKE (kg/Ha)			Average
	Soil Type	TRT	N	P	K	N	P	K
	1	1	42.6447	8.35536	31.1242	45.5486	9.14197	29.9087
	1	1	52.1862	9.79162	32.1641
	1	1	42.8998	9.61952	28.3546
	1	1	44.4637	8.80139	27.9921
	1	2	22.5858	4.54995	14.2861	20.4843
	1	2	20.1618	3.33673	12.6181
	1	2	18.5034	4.1279	13.034
	1	2	20.6859	4.20853	13.2814
	1	3	29.5429	5.25576	21.1396		5.02828
	1	3	28.0051	4.3936	18.5069
	1	3	29.9442	5.53152	19.4455
	1	3	27.2137	4.93226	20.2584
	1	4	35.0582	6.56177	18.3918			19.0392
	1	4	33.6676	6.65592	18.9384
	1	4	32.8707	6.22334	16.3033
	1	4	38.329	6.50395	22.5232
	2	1	37.41	7.5261	21.4282	36.4487	7.20456	20.8132
	2	1	34.4209	7.25082	18.1907
	2	1	34.9358	5.79105	20.757
	2	1	39.0283	8.25027	22.8768
	2	2	10.4774	4.574	8.12037	9.2
	2	2	10.0421	2.28333	7.43662
	2	2	8.28708	2.42398	7.146
	2	2	8.02247	2.17649	7.29971
	2	3	17.7195	3.69109	12.2879		3.36042
	2	3	18.1515	3.13053	12.6357
	2	3	17.5049	3.09296	11.9599
	2	3	18.3526	3.52711	10.3542
	2	4	20.5345	3.73824	9.73664			11.8774
	2	4	17.8928	4.4456	11.648
	2	4	23.4624	4.80022	11.768
	2	4	23.9823	5.40244	14.357
	Recent Alluvial									OLD Alluvial
	TRT	Mean				SD					Mean				SE
		N	P	K		N	P	K			N	P	K		N	P	K
	NPK	45.5486	9.14197	29.9087		4.49753	0.679422	2.05368		NPK	36.4487	7.20456	20.8132		2.15867	1.03232	1.95936
	PK	20.4843	4.05578	13.3049		1.68174	0.513084	0.709088		PK	9.20726	7.20456	20.8132		1.23297	1.1442	0.429847
	NK	28.6765	5.02828	19.8376		1.28429	0.488888	1.125		NK	17.9321	3.36042	11.8094		0.388408	0.295248	1.00867
	NP	34.9814	6.48625	19.0392		2.40785	0.186122	2.58537		NP	21.468	4.59662	11.8774		2.82565	0.695324	1.89699

## Sheet: Fig. 6 Matrix Correlation
		0.923046	0.913189	0.886119	0.623907	0.542994	0.66545	0.934452	0.737985	0.343261	0.725534	0.896258	0.92547	0.967962	0.949741			Stem wt	0.883561	0.862686	0.840806	0.427659	0.395361	0.892417	0.711648	0.800049	0.77901	0.682857	0.782761	0.916647	0.876199	0.905634
		Biomass (g per pot)			Stem mineral content (g Kg-1)			Leaf mineral content (g Kg-1)			Fruit mineral content (g Kg-1)			Mineral uptake (g per pot)					Leaf wt	0.934788	0.845006	0.602825	0.360396	0.905034	0.783855	0.805834	0.751911	0.736636	0.796231	0.965723	0.919068	0.918881
SITES	TRT	Stem	Leaf	Fruit	N	P	K	N	P	K	N	P	K	N	P	K				Fruit wt	0.819725	0.611185	0.425606	0.904923	0.829016	0.833526	0.744802	0.776749	0.858736	0.96903	0.911752	0.949226
1	1	9.72	5.7	10.2	6.4	3.2	8.4	19.1	1.45	6.74	11.1	1.26	7.3	42.6447	8.35536	31.1242					Stem N	0.469219	0.284406	0.909489	0.729909	0.741888	0.856553	0.688256	0.778561	0.882903	0.773375	0.826052
1	1	10.384	6.8	10.8	7.5	3.4	7.9	20.81	1.6	6.54	11.9	1.39	6.9	52.1862	9.79162	32.1641						Stem P	0.0297985	0.591463	0.6383	0.289549	0.602082	0.486864	0.374509	0.61542	0.681349	0.465954
1	1	9.4	5.4	10.4	6.94	3.7	7.7	19.25	1.65	5.74	11.232	1.58	7.1	42.8998	9.61952	28.3546							Stem K	0.220996	0.05008	0.415164	0.248754	0.404664	0.605283	0.412009	0.348341	0.575052
1	1	9.9	5.796	10.6	6.7	3.6	7.8	18.85	1.33	5.34	11.4	1.1	6.3	44.4637	8.80139	27.9921								Leaf N	0.849896	0.796604	0.866005	0.682678	0.773937	0.935175	0.842863	0.849838
1	2	7.4	4.04	4.6	5.76	2.9	7.1	14.4	0.93	4.2	10.82	0.7	4.3	22.5858	4.54995	14.2861									Leaf P	0.740226	0.739858	0.810007	0.734852	0.841405	0.830528	0.756523
1	2	6.1168	3.13864	5.4	6	2.5	7.5	13.6	0.74	3.8	10.19	0.6	3.9	20.1618	3.33673	12.6181										Leaf K	0.668708	0.704902	0.796273	0.842363	0.729393	0.866546
1	2	7.016	3.14	4.8	5.52	2.8	7.4	12.2	0.89	3.6	9.65	0.7	3.8	18.5034	4.1279	13.034											Fruit N	0.635681	0.684145	0.83194	0.740153	0.721177
1	2	7.13	3.63	5.06	5.76	2.8	7	13.1	0.91	4.1	9.74	0.6	3.6	20.6859	4.20853	13.2814												Fruit P	0.848294	0.79536	0.836442	0.827474
1	3	9.44	4.4352	7.6	6.08	2.4	7.4	17	1.15	5.3	8.442	0.67	5.1	29.5429	5.25576	21.1396													Fruit K	0.858476	0.799283	0.926562
1	3	7.52	4.2	7.2	6.24	2.3	6.9	16	1.22	6.1	10.08	0.7	5.3	28.0051	4.3936	18.5069														N Uptake	0.946379	0.955681
1	3	9.024	5.04	6.8	6.32	2.6	7.1	15.3	0.99	5.6	9.63	0.9	4.3	29.9442	5.53152	19.4455															P Uptake	0.911957
1	3	8.496	4.0656	6.4	6.24	2.4	7.8	16	1.04	6.5	9.9	0.97	5.3	27.2137	4.93226	20.2584																K Uptake
1	4	7.744	5.088	8.4	6.48	3.5	6.5	17.5	1.33	5.6	11.25	0.85	4.3	35.0582	6.56177	18.3918
1	4	8.4224	4.704	7.4	6	3.4	6.9	18	1.34	5.1	12.06	0.9	4.9	33.6676	6.65592	18.9384
1	4	8.416	4.2336	7.6	6.24	3.2	6.1	19	1.39	5.3	11.34	0.8	3.7	32.8707	6.22334	16.3033
1	4	7.552	5.9112	9.2	6.48	3.3	7.4	18	1.26	5.8	10.89	0.9	5.5	38.329	6.50395	22.5232
2	1	9.4	5.62	8.8	5.9	3.4	7.4	18.6	1.305	5.818	10.16	0.88	4.611	37.41	7.5261	21.4282
2	1	9.2	5.0264	7.4	6.1	3.4	6.9	18.5	1.35	4.565	10.86	0.98	5.481	34.4209	7.25082	18.1907
2	1	9.1	5.35	8.4	6.3	3.1	7.7	18.8	1.197	5.482	11.2	0.712	4.785	34.9358	5.79105	20.757
2	1	9.832	5.8	9.4	5.8	3.8	6.9	19.1	1.251	5.482	10.336	0.801	4.611	39.0283	8.25027	22.8768
2	2	4.5	3.06	3.1	4.2	2.4	6.5	7.3592	0.77	3.237	6.2694	0.623	2.741	10.4774	4.574	8.12037
2	2	4.1	2.42	2.88	4.4	2.5	6.9	7.828	0.86	3.684	7.371	0.534	3.306	10.0421	2.28333	7.43662
2	2	3.843	2.32	3.68	3.6	2.5	6.4	8.0796	0.81	3.737	6.1597	0.423	2.263	8.28708	2.42398	7.146
2	2	3.46	2.14	3.52	3.4	2.7	7.8	6.8624	0.82	3.984	7.68	0.712	2.872	8.02247	2.17649	7.29971
2	3	5.5272	3.6216	5.4	5.26	2.8	7.1	13.6	1.035	4.142	8.928	0.712	4.177	17.7195	3.69109	12.2879
2	3	5.2038	3.528	6.2	5.04	2.7	6.7	12.9	1.026	4.399	7.947	0.76	4.611	18.1515	3.13053	12.6357
2	3	4.8	3.78	5.4	5.31	2.6	7.1	13.6	0.891	3.818	7.371	0.645	3.741	17.5049	3.09296	11.9599
2	3	4.5	3.0492	5.6	5.12	3.6	7.3	12	0.936	3.818	8.766	0.534	3.741	18.3526	3.52711	10.3542
2	4	5.5272	3.55608	5.1	5.58	2.8	5.5	15	1.395	4.633	9.828	0.891	3.611	20.5345	3.73824	9.73664
2	4	6.6038	3.4398	5.6	5.22	2.9	5.4	14.45	1.206	4.233	9.171	0.712	3.611	17.8928	4.4456	11.648
2	4	5.7	4.05	5.4	6.11	3.7	6.1	16.15	1.217	4.482	10.404	0.712	3.82	23.4624	4.80022	11.768
2	4	6.55872	4.4334	6.4	5.88	3.6	6.2	14.45	1.134	4.16	8.946	0.801	3.22	23.9823	5.40244	14.357
