# Supplementary material for: Yield-limiting nutrient response of lowbush blueberry grown in recent and ancient alluvial soils of the Mekong Delta
Source: PeerJ. 2024 Sep 27;12:e17992. doi: 10.7717/peerj.17992 (PMC11441383; doi:10.7717/peerj.17992)
Supplement: Supplemental Information 2 [file peerj-12-17992-s002.xls]

## Sheet: Sheet1
Categorical Data	convert number	respective factor
Sites (Soil types)	1	Recent Alluvial soil
	2	Ancient Alluvial soil
TRT (Omission Treatment)	1	NPK
	2	PK
	3	NK
	4	NP
laplai (Replication)	1	first replication
	2	second replication
	3	third replication
	4	fourth replication
